# Supplementary material for: Titania as a driving agent for DHICA polymerization: a novel strategy for the design of bioinspired antimicrobial nanomaterials
Source: Royal Society of Chemistry journal article supplement (doi:10.1039/c5tb00039d), 2015-01-01
Supplement: c5tb00039d1.pdf [file c5tb00039d1.pdf]

## ELECTRON SUPPORTING INFORMATION (ESI)

### **Titania as driving agent of DHICA polymerization: a novel strategy for the design of bioinspired antimicrobial nanomaterials**

Giuseppe Vitiello,<sup>a,b</sup> Alessandro Pezzella,<sup>c</sup> Anna Zanfardino,<sup>d</sup> Mario Varcamonti,<sup>d</sup>  
Brigida Silvestri,<sup>a</sup> Aniello Costantini,<sup>a</sup> Francesco Branda<sup>a</sup> and Giuseppina Luciani<sup>a,\*</sup>

<sup>a</sup> Dipartimento di Ingegneria Chimica, dei Materiali e della Produzione Industriale, Università di Napoli “Federico II”, p.le V. Tecchio, 80, 80125 - Napoli, Italy.

<sup>b</sup> CSGI, Consorzio Interuniversitario per lo Sviluppo dei Sistemi a Grande Interfase, Florence, Italy.

<sup>c</sup> Dipartimento di Scienze Chimiche, Università di Napoli “Federico II” via Cintia 4, 80126- Napoli, Italy.

<sup>d</sup> Dipartimento di Biologia, Università di Napoli “Federico II” via Cintia 4, 80126 – Napoli, Italy.

\* Corresponding author. Tel.: +390817682433; Fax: +390817682595. E-mail address: giuseppina.luciani@unina.it

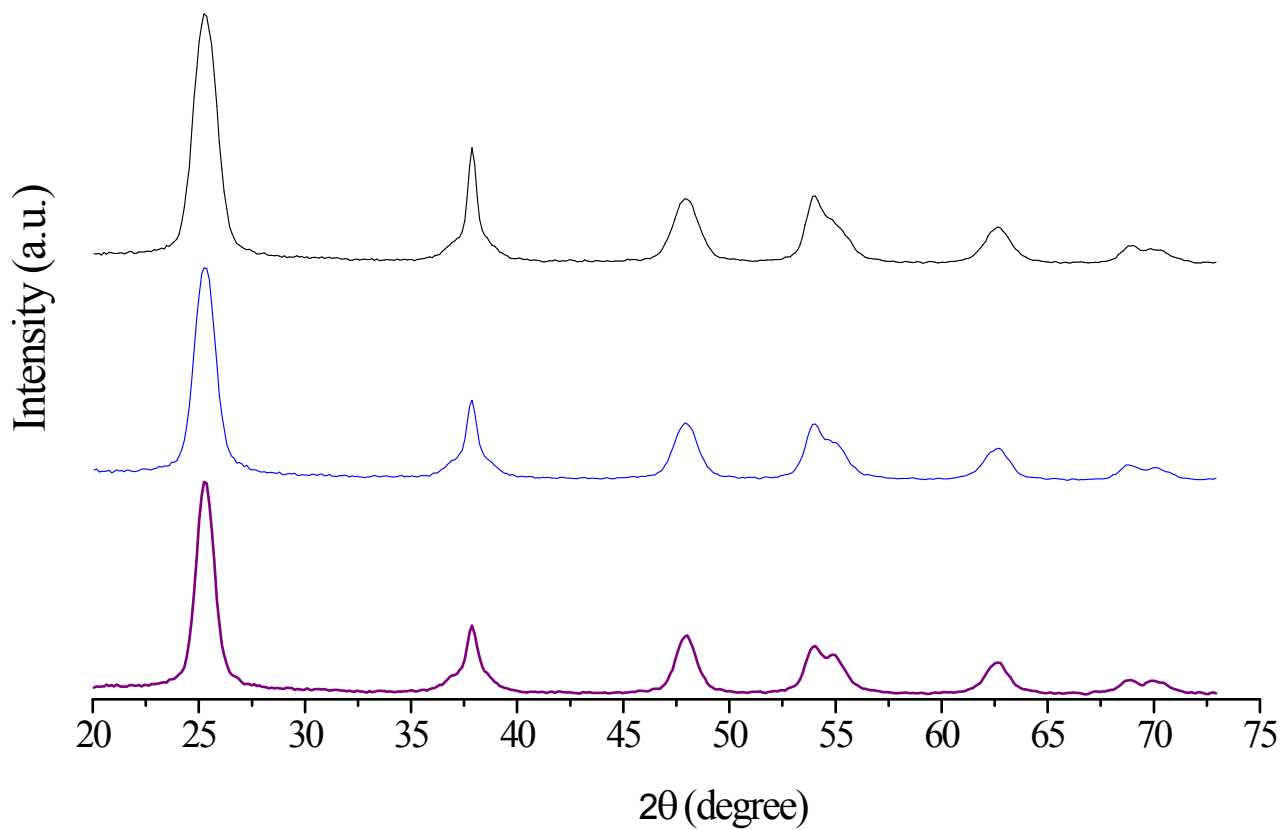

**Fig. ESI1** Powder XRD results for bare TiO<sub>2</sub> (black line), TiO<sub>2</sub>-DHICA<sub>ti</sub> (blue line) and TiO<sub>2</sub>-DHICA<sub>polym</sub> (purple line) nanomaterials.

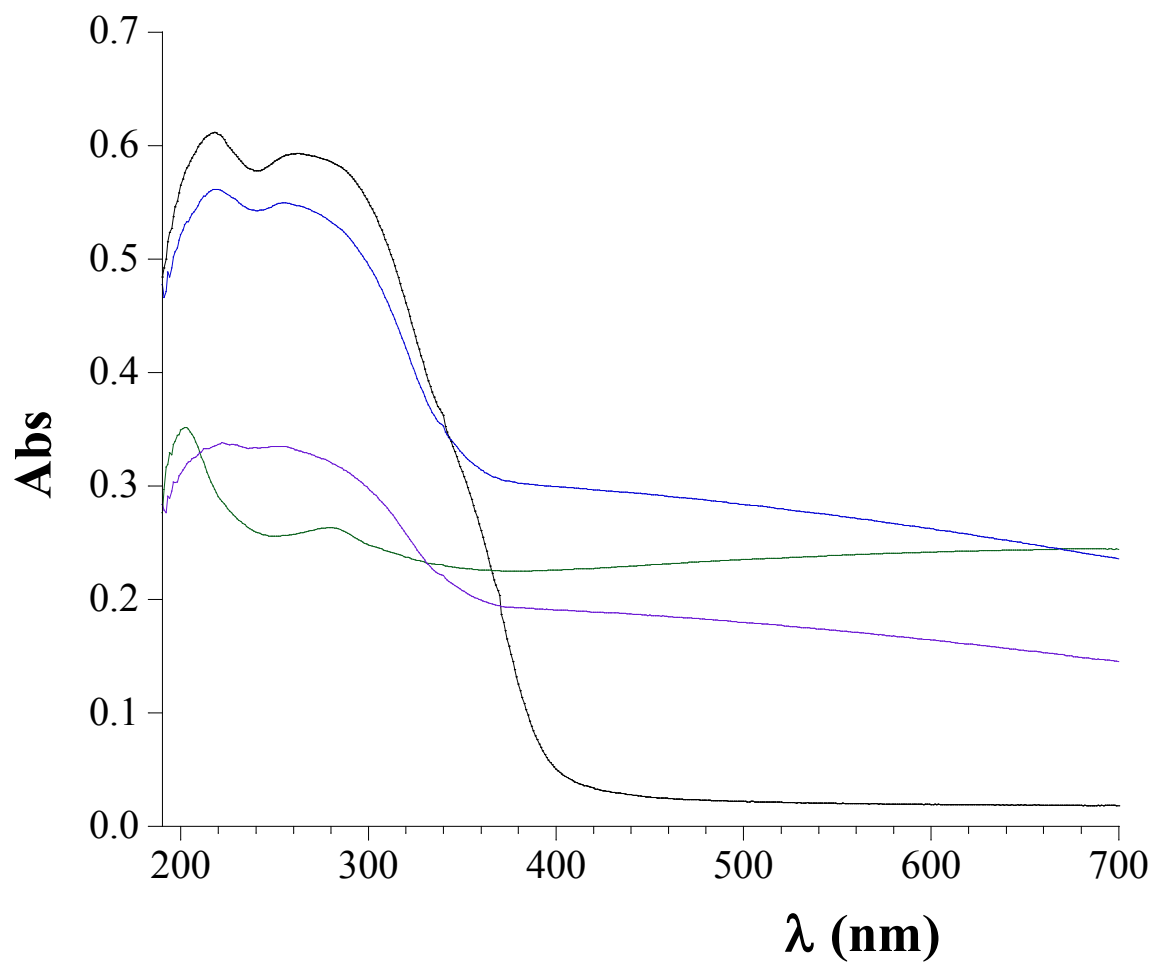

**Fig. ESI2** DRUV results of bare TiO<sub>2</sub> (black line), TiO<sub>2</sub>-DHICA<sub>ti</sub> (blue line), TiO<sub>2</sub>-DHICA<sub>polym</sub> (purple line) and DHICA-melanin (green line) nanomaterials.

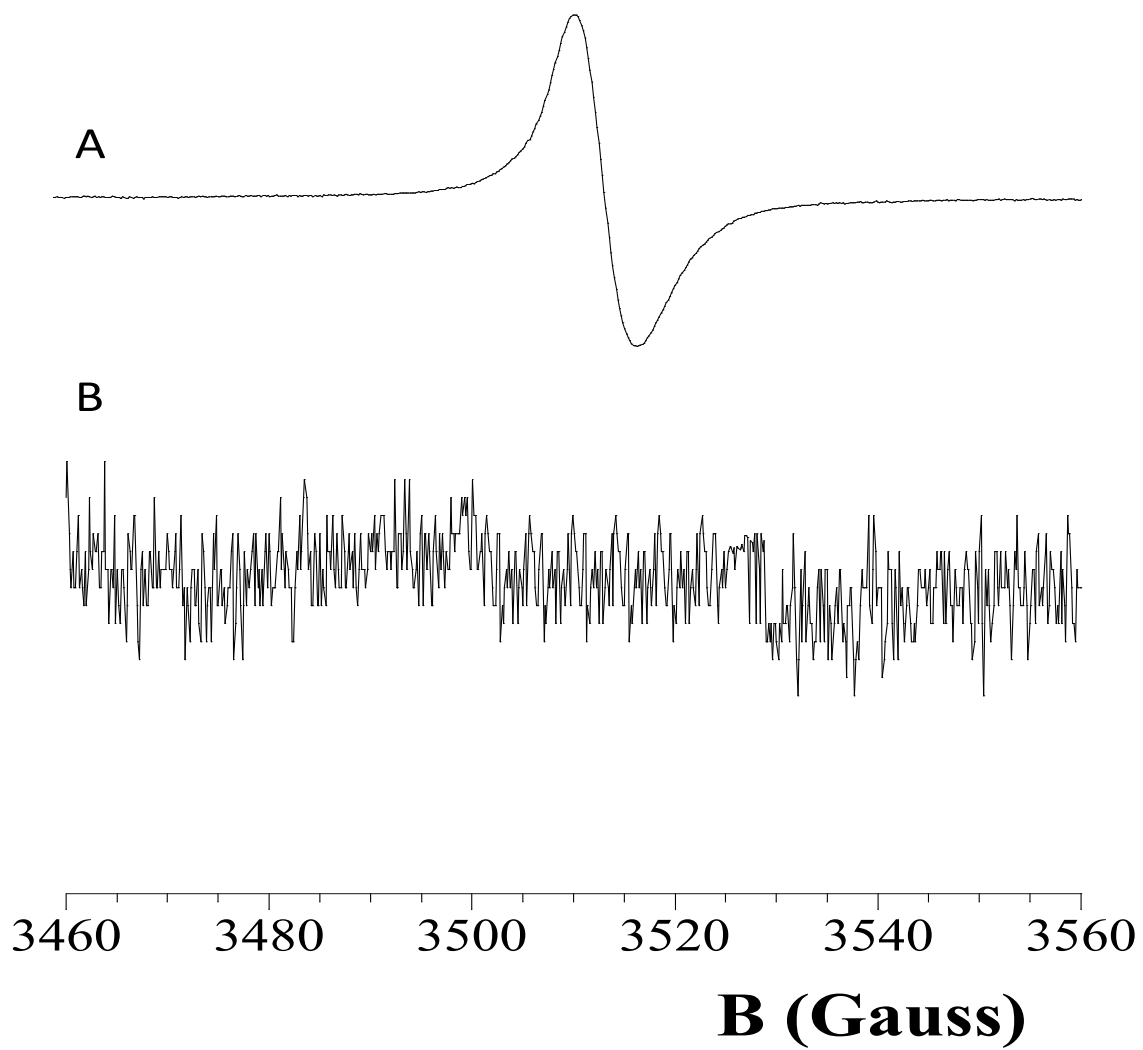

**Fig. ESI3** EPR spectra of synthesis product ( $\text{TiO}_2$ -DHICA<sub>ti</sub> nanosystem as reported in the manuscript) in the presence (spectrum A) and in the absence of titania precursor (spectrum B).

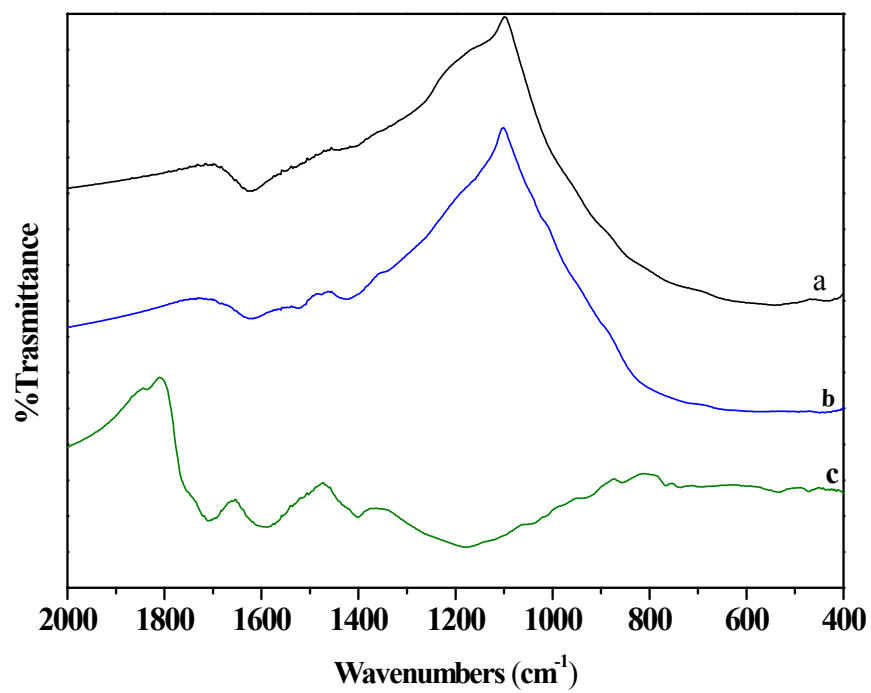

**Fig. ESI4** FT-IR spectra of bare TiO<sub>2</sub> (black line), TiO<sub>2</sub>-DHICA\_polym (purple line) and DHICA-melanin (green line) nanomaterials.
